# Supplementary material for: Efficient regio- and stereoselective access to novel fluorinated β-aminocyclohexanecarboxylates
Source: publisher site journal article supplement (doi:10.3762/bjoc.9.130), 2013-06-17
Supplement: Additional file 1 [file 1860-5397-9-130-S1.pdf]

**Supporting Information**  
**for**  
**Efficient regio- and stereoselective access to novel fluorinated  $\beta$ -aminocyclohexanecarboxylates**

Loránd Kiss<sup>1</sup>, Melinda Nonn<sup>2</sup>, Reijo Sillanpää<sup>3</sup>, Santos Fustero<sup>4</sup> and Ferenc Fülöp<sup>1,2\*</sup>

Address: <sup>1</sup>University of Szeged, Institute of Pharmaceutical Chemistry, Szeged, Hungary,

<sup>2</sup>Stereochemistry Research Group of the Hungarian Academy of Sciences, University of Szeged, H-6720 Szeged, Eötvös 6, Hungary, <sup>3</sup>Department of Chemistry, University of Jyväskylä, FIN-40014, Jyväskylä, Finland and <sup>4</sup>Universidad de Valencia, Facultad de Farmàcia, Departamento de Química Orgánica, Valencia, Spain

Email: Ferenc Fülöp - fulop@pharm.u-szeged.hu

\*Corresponding author

**Experimental procedures and characterization of compounds**

## Experimental

The chemicals were purchased from Sigma–Aldrich. The NMR spectra were recorded at 400 MHz in CDCl<sub>3</sub> or DMSO as solvent, with tetramethylsilane as the internal standard. The solvents were used as received from the suppliers. Melting points were determined with a Kofler apparatus. Elemental analyses were recorded on a Perkin-Elmer CHNS-2400 Ser II Elemental Analyzer. Silica gel 60 F254 was purchased from Merck.

### General procedure for iodooxazine formation

To a solution of  $\beta$ -amino ester (**1** or **10**, 2.68 g, 10 mmol) in CH<sub>2</sub>Cl<sub>2</sub> (60 mL), H<sub>2</sub>O (60 mL), KI (1.5 equiv) and I<sub>2</sub> (1.5 equiv) were added and the mixture was stirred at room temperature for 18 h. It was then diluted with CH<sub>2</sub>Cl<sub>2</sub> (60 mL) and washed with saturated aqueous Na<sub>2</sub>SO<sub>3</sub> solution (3 x 50 mL). The organic layer was next dried over Na<sub>2</sub>SO<sub>4</sub> and concentrated under reduced pressure to give **2** or **11** as a yellowish, white solid, which was crystallized from Et<sub>2</sub>O.

### Ethyl (1*R*\*,5*S*\*,6*R*\*,8*R*\*)-8-iodo-3-oxo-2-oxa-4-azabicyclo[3.3.1]nonane-6-carboxylate (**2**)

A yellowish-white solid (Et<sub>2</sub>O); mp 154–156 °C; yield: 69% (*R*<sub>f</sub> 0.25, *n*-hexane/EtOAc 1:2); <sup>1</sup>H NMR (400 MHz, CDCl<sub>3</sub>)  $\delta$  1.20 (t, 3H, *t*-Bu), 1.88-2.07 (m, 3H, CH<sub>2</sub>), 2.50-2.58 (m, 1H, CH<sub>2</sub>), 2.78-2.85 (m, 1H, H-6), 3.69-3.74 (m, 1H, H-5), 4.02-4.12 (m, 2H, OCH<sub>2</sub>), 4.55-4.60 (m, 1H, H-1), 4.71-4.75 (m, 1H, H-8), 7.63 (brs, 1H, N-H); <sup>13</sup>C NMR (100 MHz, DMSO)  $\delta$  20.5, 25.8, 28.6, 29.2, 43.6, 47.1, 61.4, 75.9, 153.1, 172.2; ESIMS (pos) *m/z*: 362.1 (M + Na); Anal. calcd for C<sub>10</sub>H<sub>14</sub>INO<sub>4</sub>: C, 35.42; H, 4.16; N, 4.13; found: C, 35.63; H, 4.44; N, 3.87.

**Ethyl (1*R*\*,5*S*\*,6*S*\*,8*R*\*)-8-iodo-3-oxo-2-oxa-4-azabicyclo[3.3.1]nonane-6-carboxylate (11)**

A yellowish-white solid (Et<sub>2</sub>O); mp 75–76 °C; yield: 71% (*R*<sub>f</sub> 0.2, *n*-hexane/EtOAc 1:2); <sup>1</sup>H NMR (400 MHz, CDCl<sub>3</sub>) δ 1.24 (t, 3H, CH<sub>3</sub>), 1.41 (s, 9H, *t*-Bu), 2.01–2.09 (m, 1H, CH<sub>2</sub>), 2.51–2.62 (m, 2H, CH<sub>2</sub>), 2.76–2.80 (m, 1H, CH<sub>2</sub>), 2.98–3.06 (m, 1H, H-6), 3.98–4.03 (m, 1H, H-8), 4.18–4.26 (m, 2H, OCH<sub>2</sub>), 4.56–4.60 (m, 1H, H-1), 4.78–4.81 (m, 1H, H-5), 6.49 (brs, 1H, N-H); <sup>13</sup>C NMR (100 MHz, DMSO) δ 14.8, 22.4, 25.9, 27.8, 43.1, 41.1, 61.4, 76.7, 153.2, 172.4; ESIMS (pos) *m/z*: 362.0 (M + Na); Anal. calcd for C<sub>10</sub>H<sub>14</sub>INO<sub>4</sub>: C, 35.42; H, 4.16; N, 4.13; found: C, 35.76; H, 4.40; N, 3.85.

**General procedure for the *N*-Boc protection of oxazinones 2 and 11**

To a solution of oxazinone (**2** or **11**, 3.39 g, 10 mmol) in THF (70 mL), Boc<sub>2</sub>O (1 equiv), DMAP (300 mg) and Et<sub>3</sub>N (1.5 equiv) were added at 0 °C and the mixture was further stirred at room temperature for 22 h. It was then diluted with EtOAc (110 mL), washed with water (2 x 60 mL), dried over Na<sub>2</sub>SO<sub>4</sub> and concentrated under reduced pressure. The crude material was purified by means of column chromatography on silica gel (*n*-hexane/EtOAc) to give **3** or **12** as a white solid.

**4-*tert*-Butyl-6-ethyl (1*R*\*,5*S*\*,6*R*\*,8*R*\*)-8-iodo-3-oxo-2-oxa-4-azabicyclo[3.3.1]nonane-4,6-dicarboxylate (3)**

A white solid; mp 126–128 °C; yield: 69% (*R*<sub>f</sub> 0.6, *n*-hexane/EtOAc 3:1); <sup>1</sup>H NMR (400 MHz, CDCl<sub>3</sub>) δ 1.26 (t, 3H, CH<sub>3</sub>), 1.45 (s, 9H, *t*-Bu), 2.03–2.11 (m, 2H, CH<sub>2</sub>), 2.32–2.39 (m, 1H, CH<sub>2</sub>), 2.74–2.81 (m, 1H, CH<sub>2</sub>), 2.89–2.96 (m, 1H, H-6), 4.02–4.10 (m, 2H, OCH<sub>2</sub>), 4.58–4.61 (m, 1H, H-5), 4.65–4.66 (m, 1H, H-1), 4.89–4.91 (m, 1H, H-8); <sup>13</sup>C NMR (100 MHz, DMSO) δ 14.7, 26.2, 26.7, 28.4, 28.9, 42.7, 50.9, 61.4, 77.1, 84.1, 148.3, 152.5,

172.1; ESIMS (pos)  $m/z$ : 462.04 ( $M + Na$ ); Anal. calcd for  $C_{15}H_{22}INO_6$ : C, 41.02; H, 5.05; N, 3.19; found: C, 41.35; H, 4.84; N, 3.41.

**4-*tert*-Butyl-6-ethyl (1*R*\*,5*S*\*,6*S*\*,8*R*\*)-8-iodo-3-oxo-2-oxa-4-azabicyclo[3.3.1]nonane-4,6-dicarboxylate (12)**

A white solid ( $Et_2O$ ); mp 109–111 °C; yield: 76% ( $R_f$  0.5, *n*-hexane/ $EtOAc$  3:1);  $^1H$  NMR (400 MHz,  $CDCl_3$ )  $\delta$  1.26 (t, 3H,  $CH_3$ ), 1.55 (s, 9H, *t*-Bu), 2.09–2.18 (m, 1H,  $CH_2$ ), 2.43–2.50 (m, 1H,  $CH_2$ ), 2.61–2.68 (m, 1H,  $CH_2$ ), 2.88–2.94 (m, 1H,  $CH_2$ ), 3.08–3.17 (m, 1H, H-6), 4.18–4.27 (m, 2H,  $OCH_2$ ), 4.49–4.53 (m, 1H, H-8), 4.74–4.78 (m, 1H, H-5), 4.79–4.73 (m, 1H, H-1);  $^{13}C$  NMR (100 MHz, DMSO)  $\delta$  14.8, 22.9, 24.3, 27.5, 28.4, 41.1, 50.1, 61.6, 77.6, 84.0, 152.5, 172.2, 208.0; ESIMS (pos)  $m/z$ : 462.11 ( $M + Na$ ); Anal. calcd for  $C_{15}H_{22}INO_6$ : C, 41.02; H, 5.05; N, 3.19; found: C, 40.83; H, 4.80; N, 3.43.

**General procedure for the deiodination reaction**

To a solution of iodooxazinone **3** or **12** (2.2 g, 5 mmol) in dry  $CH_2Cl_2$  (60 mL), *n*- $Bu_3SnH$  (2 equiv) and AIBN (400 mg) were added and the mixture was stirred under reflux for 8 h. The solvent was then evaporated under reduced pressure and the crude product was purified by column chromatography on silica gel (*n*-hexane/ $EtOAc$ ).

**4-*tert*-Butyl-6-ethyl (1*S*\*,5*S*\*,6*R*\*)-3-oxo-2-oxa-4-azabicyclo[3.3.1]nonane-4,6-dicarboxylate (4)**

A white solid ( $Et_2O$ ); mp 112–114 °C; yield: 72% ( $R_f$  0.5, *n*-hexane/ $EtOAc$  2:1);  $^1H$  NMR (400 MHz,  $CDCl_3$ )  $\delta$  1.24 (t, 3H,  $CH_3$ ), 1.51 (s, 9H, *t*-Bu), 1.52–1.62 (m, 1H,  $CH_2$ ), 1.77–1.83 (m, 1H,  $CH_2$ ), 1.90–2.11 (m, 2H,  $CH_2$ ), 2.18–2.24 (m, 2H,  $CH_2$ ), 2.57–2.61 (m, 1H, H-6), 4.04–4.12 (m, 2H,  $OCH_2$ ), 4.64–4.68 (m, 1H, H-5), 4.98–5.02 (m, 1H, H-1);  $^{13}C$  NMR (100 MHz,

DMSO)  $\delta$  14.7, 18.8, 28.8, 29.7, 29.9, 46.6, 51.3, 61.0, 74.3, 83.5, 149.3, 152.9, 172.9; ESIMS (pos)  $m/z$ : 336.18 (M + Na); Anal. calcd for C<sub>15</sub>H<sub>23</sub>NO<sub>6</sub>: C, 57.50; H, 7.40; N, 4.47; found: C, 57.22; H, 7.12; N, 4.69.

**4-*tert*-Butyl-6-ethyl (1*S*\*,5*S*\*,6*S*\*)-3-oxo-2-oxa-4-azabicyclo[3.3.1]nonane-4,6-dicarboxylate (13)**

A yellow oil; yield: 69% ( $R_f$  0.45, *n*-hexane/EtOAc 2:1); <sup>1</sup>H NMR (400 MHz, DMSO)  $\delta$  1.20 (t, 3H, CH<sub>3</sub>), 1.43 (s, 9H, *t*-Bu), 1.58-2.10 (m, 6H, CH<sub>2</sub>), 2.91-2.99 (m, 1H, H-6), 4.11-4.19 (m, 2H, OCH<sub>2</sub>), 4.61-4.68 (m, 2H, H-1 and H-4); <sup>13</sup>C NMR (100 MHz, DMSO)  $\delta$  14.8, 14.9, 26.5, 26.7, 28.3, 43.3, 51.8, 61.4, 74.4, 83.6, 149.2, 151.4, 172.2; ESIMS (pos)  $m/z$ : 336.27 (M + Na); Anal. calcd for C<sub>15</sub>H<sub>23</sub>NO<sub>6</sub>: C, 57.50; H, 7.40; N, 4.47; found: C, 57.19; H, 7.16; N, 4.12.

**General procedure for the preparation of hydroxylated amino esters**

*Synthesis from oxazinones:*

To a solution of oxazinone **4** or **13** (1.13 g, 5 mmol) in EtOH (20 mL), NaOEt (1 equiv) was added at 0 °C and the mixture was stirred at this temperature for 1 h. Next, water (20 mL) was added to the mixture and it was extracted with CH<sub>2</sub>Cl<sub>2</sub> (3 x 20 mL). The combined organic layers were dried (Na<sub>2</sub>SO<sub>4</sub>) and concentrated under reduced pressure. The crude product was purified by means of column chromatography on silica gel (*n*-hexane/EtOAc).

*Synthesis from epoxide:*

To a solution of epoxyamino ester **6** [1] (855 mg, 3 mmole) in EtOH (25 mL), NaBH<sub>4</sub> (2 equiv) was added and the mixture was stirred at 70 °C for 2 h. It was then diluted with H<sub>2</sub>O (30 mL) and extracted with CH<sub>2</sub>Cl<sub>2</sub> (3 x 20 mL), the combined organic layers were dried

(Na<sub>2</sub>SO<sub>4</sub>) and the solvent was evaporated off under reduced pressure. The crude product was purified by column chromatography on silica gel (*n*-hexane/EtOAc), giving compound **5**.

**Ethyl (1*R*\*,2*S*\*,4*S*\*)-2-(*tert*-butoxycarbonylamino)-4-hydroxycyclohexanecarboxylate (**5**)**

A white solid; mp 64–65 °C; yield: 68% (66%) (*R*<sub>f</sub> 0.4, *n*-hexane/EtOAc 1:1); <sup>1</sup>H NMR (400 MHz, DMSO) δ 1.19 (t, 3H, CH<sub>3</sub>, *J* = 7.20 Hz), 1.39 (s, 9H, *t*-Bu), 1.40-1.48 (m, 1H, CH<sub>2</sub>), 1.53-1.59 (m, 2H, CH<sub>2</sub>), 1.66-1.75 (m, 2H, CH<sub>2</sub>), 1.84-1.93 (m, 1H, CH<sub>2</sub>), 2.63-2.68 (m, 1H, H-1), 3.67-3.73 (m, 1H, H-2), 3.79-3.85 (m, 1H, H-4), 3.97-4.04 (m, 2H, OCH<sub>2</sub>), 4.83 (brs, 1H, O-H), 6.39 (brs, 1H, N-H); <sup>13</sup>C NMR (100 MHz, DMSO) δ 14.8, 21.1, 30.9, 31.6, 37.3, 44.5, 49.0, 60.5, 66.8, 78.6, 155.2, 173.7; ESIMS (pos) *m/z*: 310.27 (M + Na); Anal. calcd for C<sub>14</sub>H<sub>25</sub>NO<sub>5</sub>: C, 58.52; H, 8.77; N, 4.87; found: C, 58.24; H, 8.99; N, 4.52.

**Ethyl (1*S*\*,2*S*\*,4*S*\*)-2-(*tert*-butoxycarbonylamino)-4-hydroxycyclohexanecarboxylate (**14**)**

A white solid; mp 114–116 °C; yield: 73% (*R*<sub>f</sub> 0.35, *n*-hexane/EtOAc 1:1); <sup>1</sup>H NMR (400 MHz, DMSO) δ 1.01-1.12 (m, 1H, CH<sub>2</sub>), 1.18 (t, 3H, CH<sub>3</sub>, *J* = 7.15 Hz), 1.38 (s, 9H, *t*-Bu), 1.38-1.42 (m, 2H, CH<sub>2</sub>), 1.76-1.82 (m, 2H, CH<sub>2</sub>), 1.89-1.93 (m, 1H, CH<sub>2</sub>), 2.17-2.23 (m, 1H, H-1), 3.38-3.43 (m, 1H, H-2), 3.43-3.48 (m, 1H, H-4), 3.96-4.09 (m, 2H, OCH<sub>2</sub>), 4.62 (brs, 1H, O-H), 6.81 (brs, 1H, N-H); <sup>13</sup>C NMR (100 MHz, DMSO) δ 14.9, 26.3, 29.0, 34.3, 40.2, 49.0, 50.2, 60.5, 67.9, 78.3, 155.4, 174.5; ESIMS (pos) *m/z*: 310.36 (M + Na); Anal. calcd for C<sub>14</sub>H<sub>25</sub>NO<sub>5</sub>: C, 58.52; H, 8.77; N, 4.87; found: C, 58.20; H, 8.46; N, 4.55.

**General procedure for the oxidation of hydroxylated amino esters**

To a solution of hydroxylated amino ester **5** or **14** (287 mg, 1 mmol) in CH<sub>2</sub>Cl<sub>2</sub> (15 mL), PCC (1.3 equiv) was added and the mixture was stirred at room temperature for 16 h. It was then diluted with CH<sub>2</sub>Cl<sub>2</sub> (20 mL), washed with water (2 x 15 mL), dried over Na<sub>2</sub>SO<sub>4</sub>, and

concentrated under reduced pressure. The crude product was purified by means of column chromatography on silica gel (*n*-hexane/EtOAc).

**Ethyl (1*R*\*,2*S*\*)-2-*tert*-butoxycarbonylamino-4-oxocyclohexanecarboxylate (8)**

A white solid; mp 72–74 °C; yield: 78% ( $R_f$  0.50, *n*-hexane/EtOAc 1:1);  $^1\text{H}$  NMR (400 MHz, DMSO)  $\delta$  1.23 (t, 3H, CH<sub>3</sub>,  $J$  = 7.10 Hz), 1.42 (s, 9H, *t*-Bu), 1.78-1.83 (m, 1H, CH<sub>2</sub>), 2.18-2.26 (m, 4H, CH<sub>2</sub> and H-1), 2.60-2.66 (m, 1H, CH<sub>2</sub>), 3.04-3.10 (m, 1H, CH<sub>2</sub>), 3.97-4.09 (m, 2H, OCH<sub>2</sub>), 4.42-4.48 (m, 1H, H-2), 7.02 (brs, 1H, N-H);  $^{13}\text{C}$  NMR (100 MHz, DMSO)  $\delta$  14.8, 22.8, 29.0, 30.0, 39.8, 43.8, 46.8, 50.4, 60.8, 78.7, 158.0, 172.9, 208.7; ESIMS (pos)  $m/z$ : 308.63 (M + Na); Anal. calcd for C<sub>14</sub>H<sub>23</sub>NO<sub>5</sub>: C, 58.93; H, 8.12; N, 4.91; found: C, 58.65; H, 8.33; N, 4.68.

**Ethyl (1*S*\*,2*S*\*)-2-*tert*-butoxycarbonylamino-4-oxocyclohexanecarboxylate (17)**

A white solid; mp 79–82 °C; yield: 71%; ( $R_f$  0.45, *n*-hexane/EtOAc 1:1);  $^1\text{H}$  NMR (400 MHz, DMSO)  $\delta$  1.22 (t, 3H, CH<sub>3</sub>,  $J$  = 7.10 Hz), 1.40 (s, 9H, *t*-Bu), 1.70-1.77 (m, 1H, CH<sub>2</sub>), 2.02-2.08 (m, 1H, CH<sub>2</sub>), 2.22-2.29 (m, 1H, CH<sub>2</sub>), 2.33-2.48 (m, 3H, CH<sub>2</sub>), 2.68-2.74 (m, 1H, H-1), 3.78-3.85 (m, 1H, H-2), 4.02-4.11 (m, 2H, OCH<sub>2</sub>), 7.06 (brs, 1H, N-H);  $^{13}\text{C}$  NMR (100 MHz, DMSO)  $\delta$  14.9, 25.8, 29.4, 39.4, 40.9, 41.1, 51.3, 60.9, 78.7, 155.3, 173.6, 208.1; ESIMS (pos)  $m/z$ : 308.56 (M + Na); Anal. calcd for C<sub>14</sub>H<sub>23</sub>NO<sub>5</sub>: C, 58.93; H, 8.12; N, 4.91; found: C, 58.63; H, 7.84; N, 4.63.

**General procedure for monofluorination**

To a solution of hydroxyamino ester (287 mg, 1 mmol) in CH<sub>2</sub>Cl<sub>2</sub> (10 mL) under an Ar atmosphere, 50% Deoxofluor in toluene (2 equiv) was added and the solution was stirred at 20 °C for 3 h. It was then diluted with CH<sub>2</sub>Cl<sub>2</sub> (30 mL) and the organic layer was washed with

saturated aqueous NaHCO<sub>3</sub> solution (2 x 20 mL), dried (Na<sub>2</sub>SO<sub>4</sub>) and concentrated. The crude product was purified by column chromatography on silica gel (*n*-hexane/EtOAc 9:1).

**Ethyl (1*R*\*,2*S*\*,4*R*\*)-2-(*tert*-butoxycarbonylamino)-4-fluorocyclohexanecarboxylate (7)**

A white solid; mp 74–76 °C; yield: 32% (*R*<sub>f</sub> 0.45, *n*-hexane/EtOAc 4:1); <sup>1</sup>H NMR (400 MHz, CDCl<sub>3</sub>) δ 1.23 (t, 3H, CH<sub>3</sub>, *J* = 7.15 Hz), 1.36 (s, 9H, *t*-Bu), 1.71–2.07 (m, 6H, CH<sub>2</sub>), 2.78–2.84 (m, 1H, H-1), 4.02–4.14 (m, 3H, H-2 and OCH<sub>2</sub>), 4.69–4.86 (m, 1H, H-4), 5.19 (brs, 1H, N-H); <sup>13</sup>C NMR (400 MHz, CDCl<sub>3</sub>) δ 14.6, 22.5, 27.3, 28.8, 34.5, 44.1, 45.6, 60.9, 80.6, 88.1, 90.3, 155.4, 161.5; <sup>19</sup>F NMR (100 MHz, CDCl<sub>3</sub>) δ –184.1; ESIMS (pos) *m/z*: 312.3 (M + Na). Anal. calcd for C<sub>14</sub>H<sub>24</sub>FNO<sub>4</sub>: C, 58.11; H, 8.36; N, 4.84; found: C, 57.83; H, 8.05; N, 4.51.

**Ethyl (1*S*\*,2*S*\*,4*R*\*)-2-(*tert*-butoxycarbonylamino)-4-fluorocyclohexanecarboxylate (16)**

A white solid; mp 102–104 °C; yield: 36% (*R*<sub>f</sub> 0.40, *n*-hexane/EtOAc 4:1); <sup>1</sup>H NMR (400 MHz, DMSO) δ 1.22 (t, 3H, CH<sub>3</sub>, *J* = 7.15 Hz), 1.34 (s, 9H, *t*-Bu), 1.48–1.52 (m, 2H, CH<sub>2</sub>), 1.70–2.02 (m, 3H, CH<sub>2</sub>), 2.21–2.29 (m, 1H, CH<sub>2</sub>), 2.30–2.48 (m, 1H, H-1), 3.79–3.93 (m, 1H, H-2), 4.03–4.16 (m, 2H, OCH<sub>2</sub>), 4.50 (brs, 1H, N-H), 4.75–4.95 (m, 1H, H-4); <sup>13</sup>C NMR (100 MHz, DMSO) δ 14.6, 23.3, 28.7, 29.6, 36.9, 47.6, 49.1, 61.1, 79.8, 87.6, 90.0, 155.2, 173.9; <sup>19</sup>F NMR (400 MHz, CDCl<sub>3</sub>) δ –184.4; ESIMS (pos) *m/z*: 312.27 (M + Na); Anal. calcd for C<sub>14</sub>H<sub>24</sub>FNO<sub>4</sub>: C, 58.11; H, 8.36; N, 4.84; found: C, 57.81; H, 8.61; N, 4.52.

**General procedure for difluorination**

To a solution of ketoester (143 mg, 0.5 mmole) in CH<sub>2</sub>Cl<sub>2</sub> (5 mL) under an Ar atmosphere, 50% Deoxofluor in toluene (4 equiv) was added and the solution was stirred at 20 °C for 5 h. It was then diluted with CH<sub>2</sub>Cl<sub>2</sub> (20 mL) and the organic layer was washed with saturated



aqueous NaHCO<sub>3</sub> solution (2 x 20 mL), dried (Na<sub>2</sub>SO<sub>4</sub>) and concentrated. The crude product was purified by column chromatography on silica gel (*n*-hexane-EtOAc 9:1).

**Ethyl (1*R*\*,2*S*\*)-2-(*tert*-butoxycarbonylamino)-4,4-difluorocyclohexanecarboxylate (9)**

A white solid; mp 62–64 °C; yield: 84% (*R*<sub>f</sub> 0.35, *n*-hexane/EtOAc 4:1); <sup>1</sup>H NMR (400 MHz, DMSO) δ 1.22 (t, 3H, CH<sub>3</sub>, *J* = 7.15 Hz), 1.33 (s, 9H, *t*-Bu), 1.69-2.55 (m, 6H, CH<sub>2</sub>, 2.68-2.74 (m, 1H, H-1), 4.02-4.13 (m, 3H, H-2 and OCH<sub>2</sub>), 5.26 (brs, 1H, N-H); <sup>13</sup>C NMR (100 MHz, DMSO) δ 14.5, 20.9, 22.6, 28.7, 31.5, 37.9, 43.6, 61.2, 80.1, 123.0, 155.3, 173.7; <sup>19</sup>F NMR (400 MHz, CDCl<sub>3</sub>) δ -91.3, -92.5; ESIMS (pos) *m/z*: 330.52 (M + Na); Anal. calcd for C<sub>14</sub>H<sub>23</sub>F<sub>2</sub>NO<sub>4</sub>: C, 54.71; H, 7.54; N, 4.56; found: C, 54.45; H, 7.22; N, 4.79.

**Ethyl (1*S*\*,2*S*\*)-2-(*tert*-butoxycarbonylamino)-4,4-difluorocyclohexanecarboxylate (18)**

A white solid; mp 113–115 °C; yield: 75% (*R*<sub>f</sub> 0.30, *n*-hexane/EtOAc 4:1); <sup>1</sup>H NMR (400 MHz, DMSO) δ 1.23 (t, 3H, CH<sub>3</sub>, *J* = 7.15 Hz), 1.30 (s, 9H, *t*-Bu), 1.58-2.08 (m, 5H, CH<sub>2</sub>), 2.26-2.41 (m, 1H, CH<sub>2</sub>), 2.48-2.55 (m, 1H, H-1), 3.94-4.02 (m, 1H, H-2), 4.05-4.13 (m, 2H, OCH<sub>2</sub>), 4.73 (brs, 1H, N-H); <sup>13</sup>C NMR (100 MHz, DMSO) δ 14.6, 23.0, 28.7, 32.2, 38.6, 46.7, 48.7, 61.4, 80.2, 122.0, 155.0, 173.1; <sup>19</sup>F NMR (400 MHz, CDCl<sub>3</sub>) δ -91.5, 92.4; ESIMS (pos) *m/z*: 330.50 (M + Na); Anal. calcd for C<sub>14</sub>H<sub>23</sub>F<sub>2</sub>NO<sub>4</sub>: C, 54.71; H, 7.54; N, 4.56; found: C, 54.48; H, 7.28; N, 4.81.

**Crystallography:** Crystallographic data for compounds **2**, **12** and **14** were collected with a Nonius-Kappa diffractometer equipped with a CCD area-detector using Mo Kα radiation (λ = 0.71073 Å), and for compound **5** with an Agilent Supernova diffractometer equipped with an Atlas area-detector, using Cu Kα radiation (λ = 1.54184 Å). SADABS absorption correction was applied to the data for **2** and **14** [2]. For **5**, analytical numeric absorption correction using

a multifaceted crystal model was performed with the CrysAlisPro program package [3,4]. The structures were solved by direct methods with the SIR97 [5] and SHELXS-97 [6] programs, and full-matrix, least-squares refinements on  $F^2$  were performed, using the SHELXL-97 [6] program. Molecular structure figures were drawn with ORTEP3 for Windows [7]. In compound **14**, the water molecule in the lattice on the two-fold axis showed a population parameter of 0.3. The full occupation in this position is 0.5.

## References

1. Kiss, L.; Forró, E.; Fülöp, F. *Tetrahedron* **2012**, *68*, 4438.  
doi:10.1016/j.tet.2011.12.065
2. SADABS, Sheldrick, G. M.; University of Göttingen: Germany, 2008.
3. Clark, R. C.; Reid, J. S. *Acta Crystallogr., Sect. A* **1995**, *51*, 887–897.  
doi:10.1107/S0108767395007367
4. CrysAlis PRO, 2012, Agilent Technologies, Yarnton, England.
5. Altomare, A.; Burla, M. C.; Camalli, M.; Cascarano, G. L.; Giacovazzo, C.;  
Guagliardi, A.; Moliterni, A. G. G.; Polidori, G.; Spagna, R. *J. Appl. Crystallogr.*  
**1999**, *32*, 115. doi:10.1107/S0021889898007717
6. Sheldrick, G. M. *Acta Crystallogr., Sect. A* **2008**, *64*, 112.  
doi:10.1107/S0108767307043930
7. Farrugia, L. J. *J. Appl. Crystallogr.* **1999**, *32*, 837. doi:10.1107/S0021889899006020
